# Supplementary material for: Molecular Basis of Inhibitory Mechanism of Naltrexone and Its Metabolites through Structural and Energetic Analyses
Source: MDPI journal article supplement (doi:10.3390/molecules27154919), 2022-08-02
Supplement: s1 [file s1]

## SUPPLEMENTARY MATERIAL

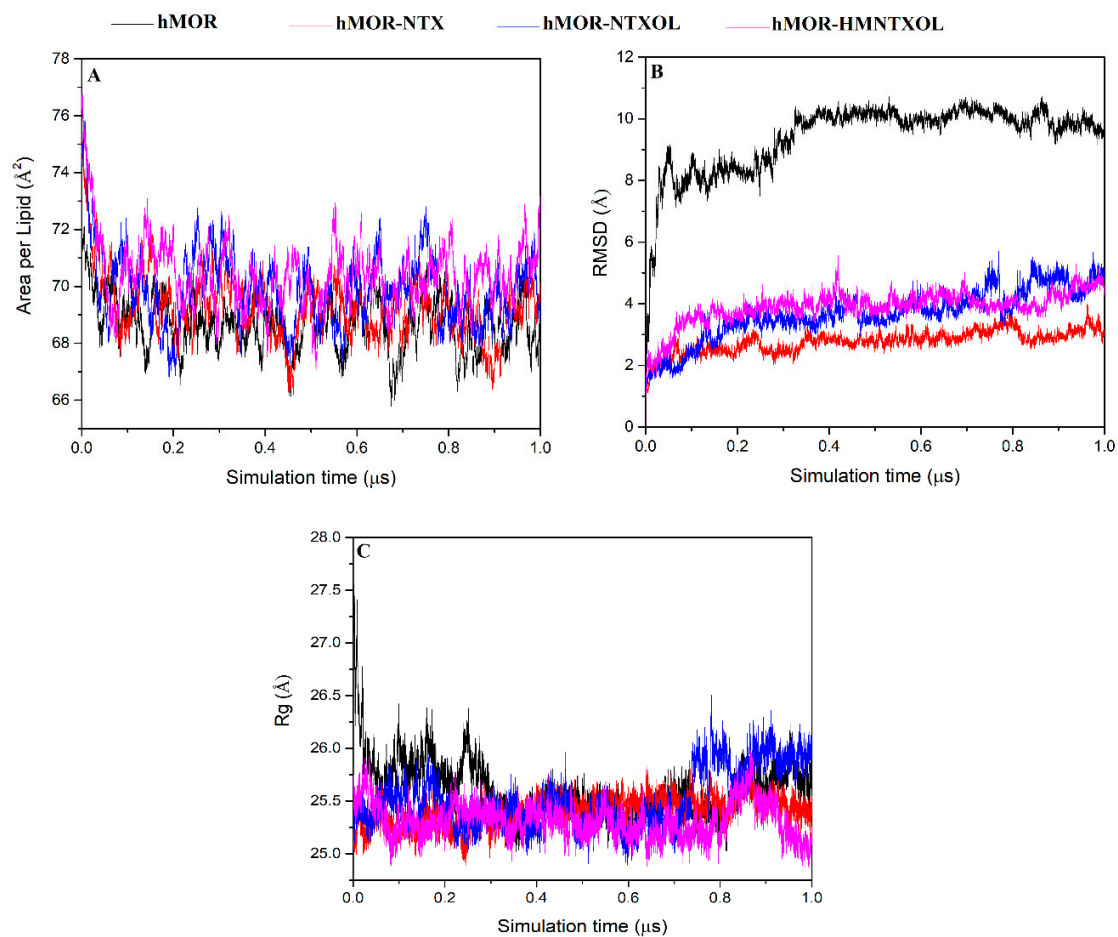

**Figure S1.** Area per lipid, root means squared deviation (RMSD), and radius of gyration (Rg) analysis of hMOR-ligand systems. Area per lipid (A), RMSD (B), and Rg (C) of hMOR-naltrexone, hMOR-NTXOL, and hMOR-HMNTXOL.

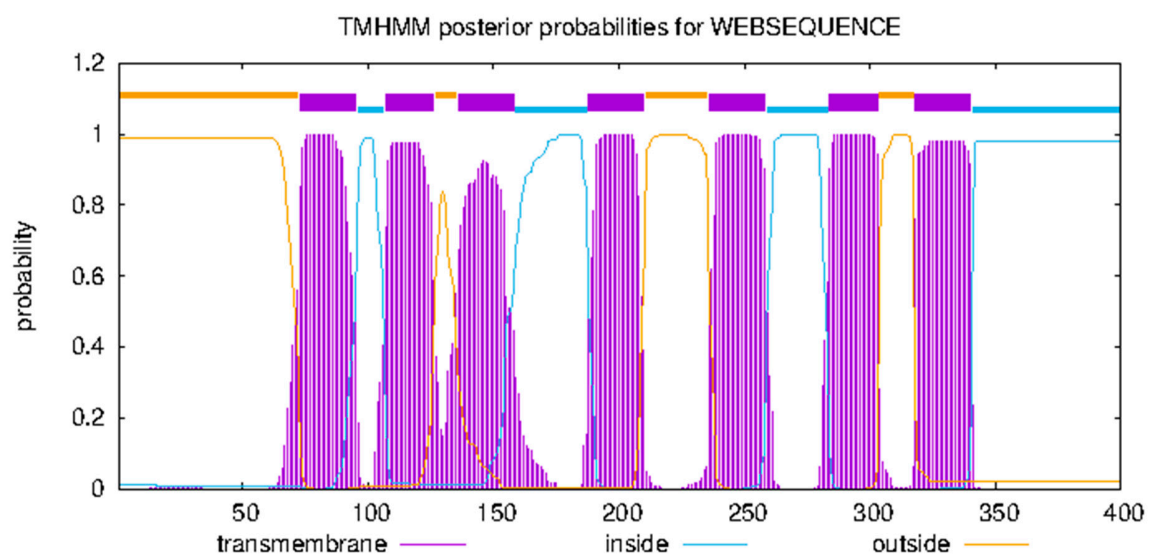

**Figure S2.** Prediction of the transmembrane helices in hMOR using TMHMM 2.0 server [44].

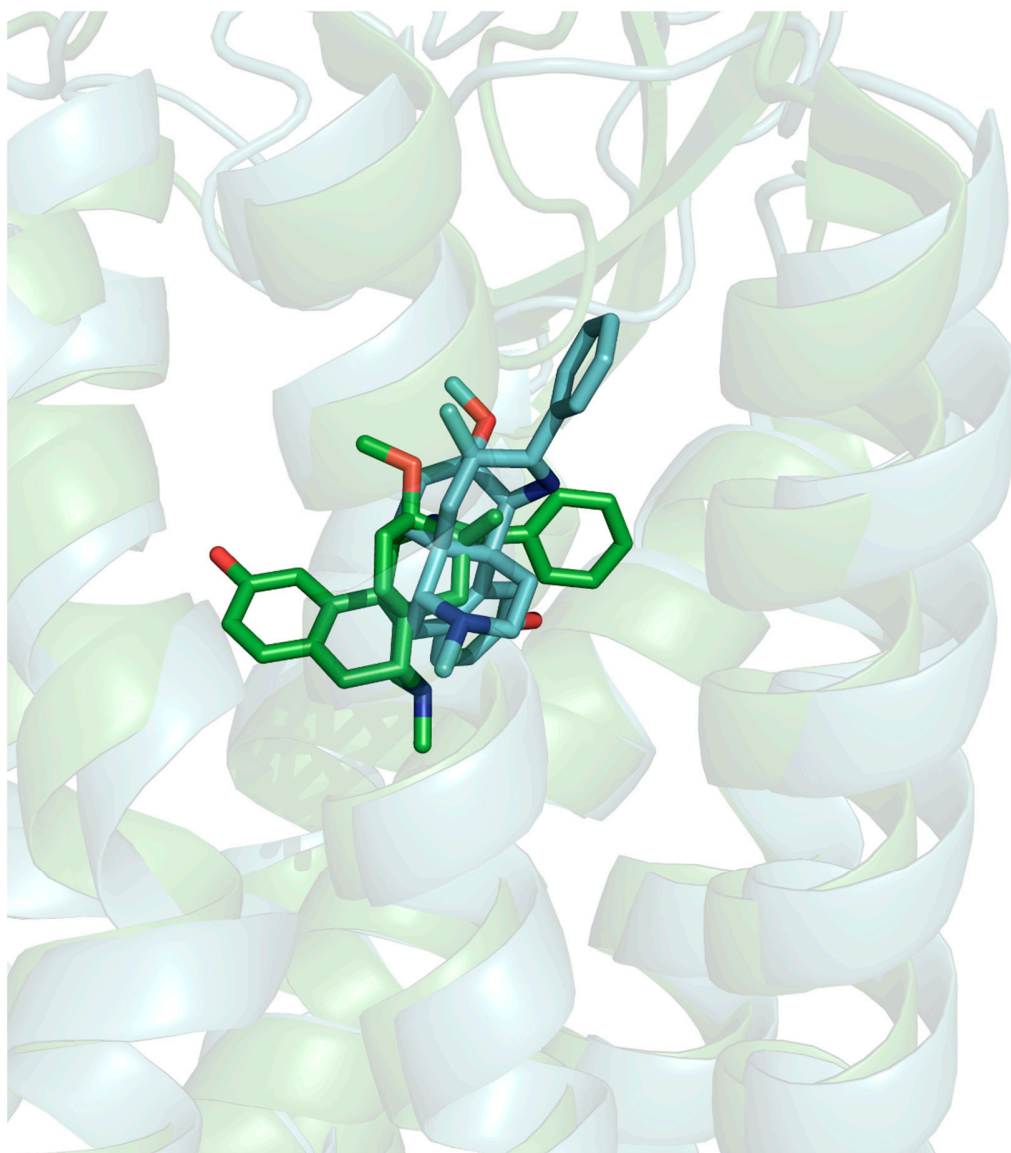

**Figure S3.** Molecular docking of the co-crystallized ligand (green) in mMOR (PDB entry 5C1M\_chainA) in the most populated hMOR conformer (cyan) obtained through MD simulations.

**Table S1.** Per-residue free energy for hMOR coupled to naltrexone, NTXOL and HMNTXOL (values kcal/mol).

| Residue | hMOR-NTX | hMOR-NTXOL | hMOR-HMNTXOL |
|---------|----------|------------|--------------|
| L114    |          | -0.131     |              |
| A115    | -0.383   | -1.173     | -0.496       |
| L118    |          | -0.280     |              |
| A119    | -0.771   | -1.128     | -0.812       |
| T120    |          | -0.119     | -0.158       |
| T122    | -0.189   | -0.114     | -0.117       |
| L123    | -0.147   |            | -0.138       |
| Q126    | -0.300   |            | -0.181       |
| N129    | -0.196   |            |              |
| I148    | -0.184   |            |              |
| Y150    |          |            | -0.805       |
| N152    | -0.206   | -0.533     |              |
| M153    | -1.780   | -1.551     | -3.050       |
| F154    |          | -0.152     | -0.134       |
| T155    |          | -0.240     |              |
| S156    |          | -0.417     |              |
| I157    |          | -1.016     | -0.229       |
| T159    |          | -0.142     |              |
| L160    |          | -0.462     |              |
| V238    |          |            | -0.730       |
| A242    |          | -0.247     | -0.129       |
| V290    |          | -0.158     |              |
| C294    | -0.351   | -0.210     |              |

|      |        |        |        |
|------|--------|--------|--------|
| W295 | -1.572 | -1.176 | -0.757 |
| I298 | -1.184 | -0.731 | -1.725 |
| H299 | -0.218 |        | -0.556 |
| V302 |        |        | -0.345 |
| C323 |        |        | -0.374 |
| I324 | -1.216 | -0.271 | -1.382 |
| A325 | -0.168 |        |        |
| L326 | -0.297 | -0.143 | -0.218 |
| G327 | -1.547 | -0.319 | -0.445 |
| Y328 | -2.774 | -0.991 | -1.522 |
| T329 | -0.219 | -0.167 |        |
| N330 | -0.876 | -1.566 | -0.160 |
| S331 | -0.316 | -0.650 | -0.439 |
| L333 |        | -0.156 |        |
| N334 |        | -1.942 | -0.228 |
